# Supplementary material for: Akkermansia muciniphila Alleviates Persistent Inflammation, Immunosuppression, and Catabolism Syndrome in Mice
Source: MDPI journal article supplement (doi:10.3390/metabo13020194), 2023-01-28
Supplement: s1 [file s1]

# PICS+live Akk

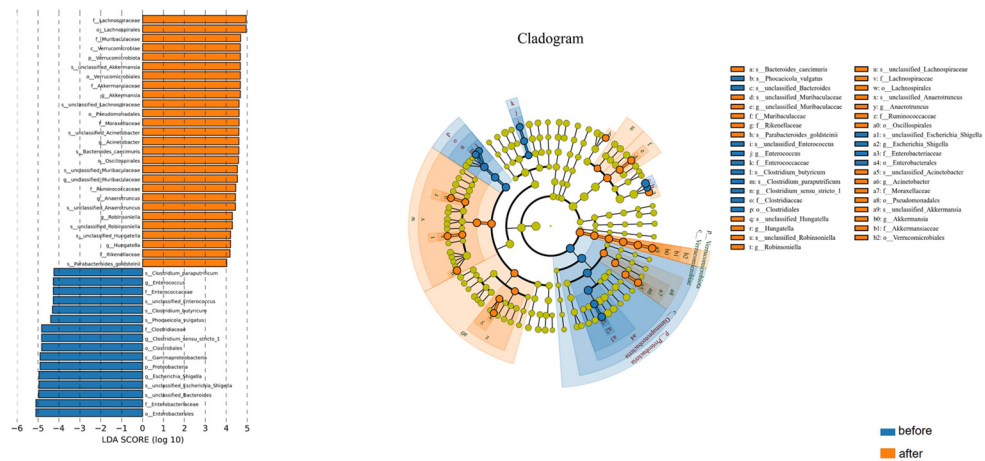

**Figure S1.** Discriminative biomarkers with an LDA score >4.0 in the PICS + live Akk group before (blue) and after (orange) intervention (left); the LefSe cladogram represents the taxa enriched before (blue) and after (orange) intervention (right).

# PICS+past. Akk

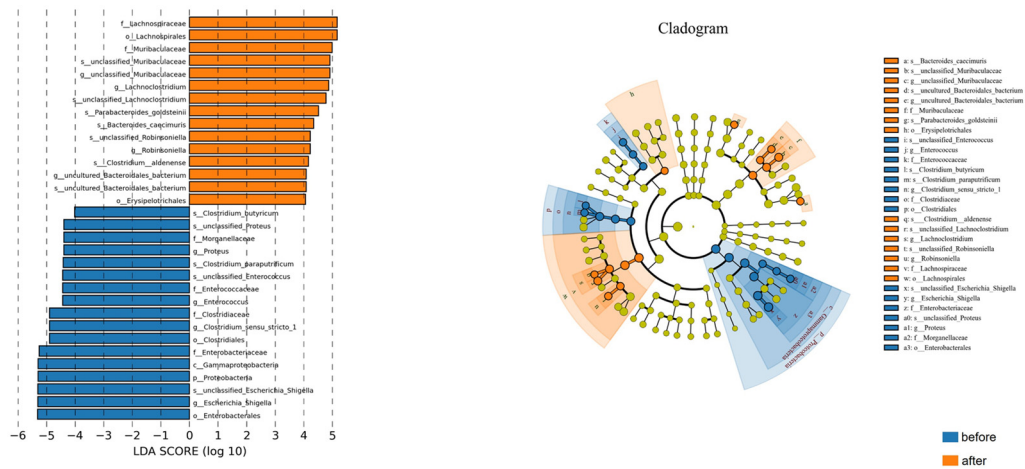

**Figure S2.** Discriminative biomarkers with an LDA score >4.0 in the PICS + pasteurized Akk group before (blue) and after (orange) intervention (left); the LefSe cladogram represents the taxa enriched before (blue) and after (orange) intervention (right).

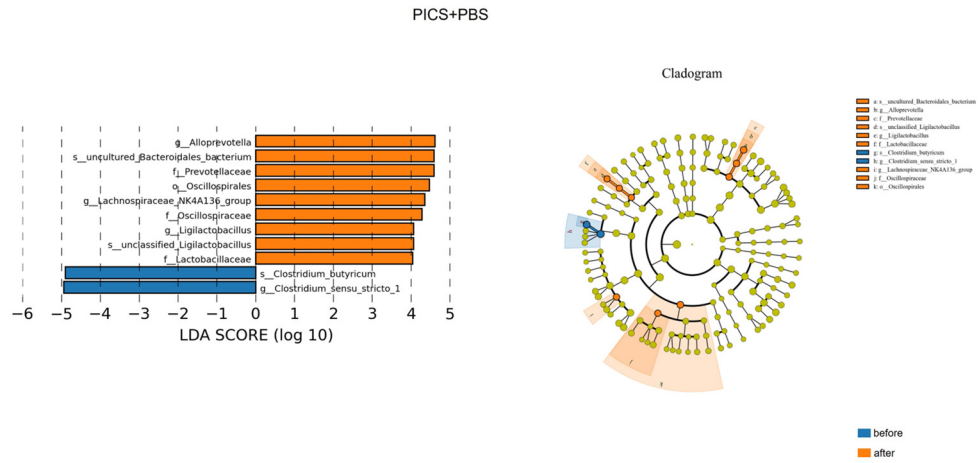

**Figure S3.** Discriminative biomarkers with an LDA score  $>4.0$  in the PICS + PBS group before (blue) and after (orange) intervention (left); the LefSe cladogram represents the taxa enriched before (blue) and after (orange) intervention (right).
